# Supplementary material for: Partial Dosage Compensation in Strepsiptera, a Sister Group of Beetles
Source: PubMed Central journal article supplement (PMC4350179; doi:10.1093/gbe/evv008), 2015-01-18
Supplement: supp_evv008_SupplFig.pdf [file supp_evv008_SupplFig.pdf]

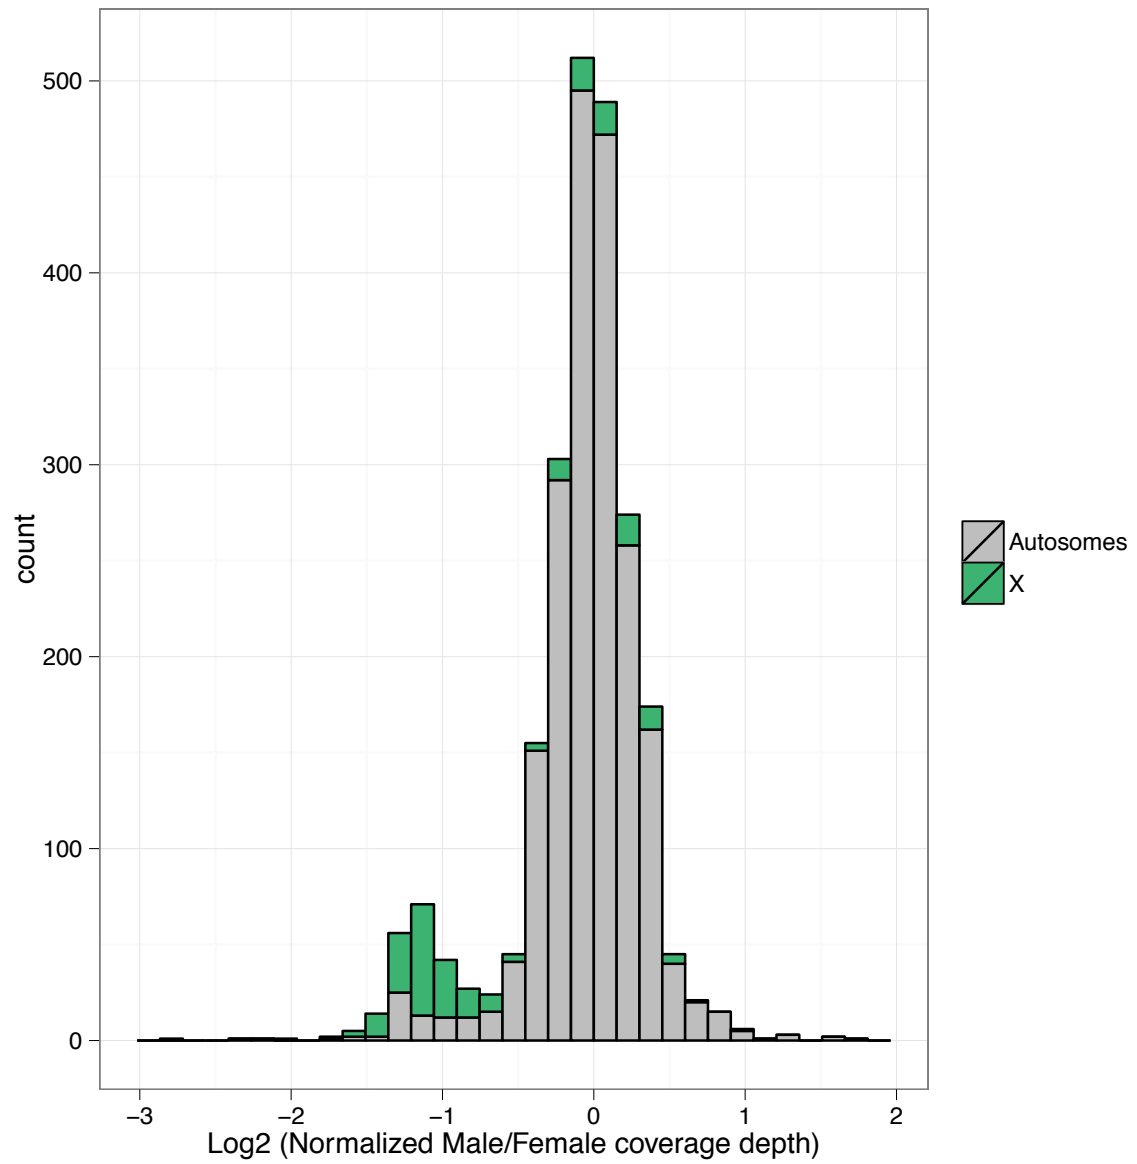

Figure S1

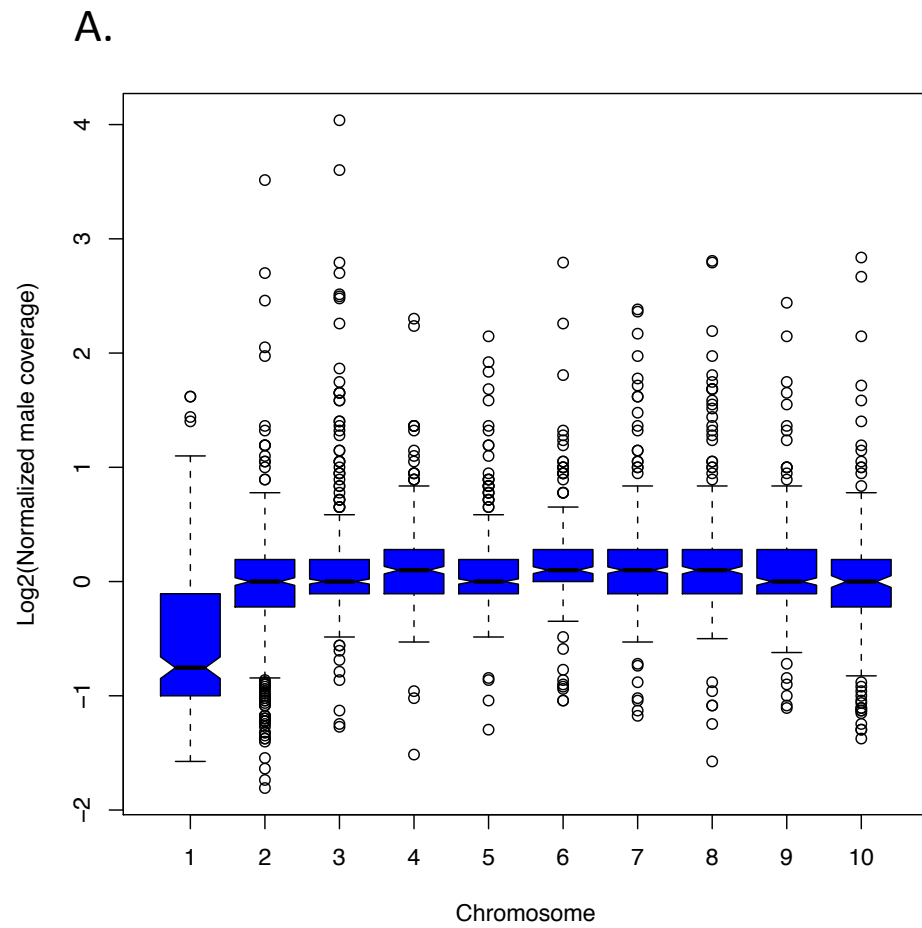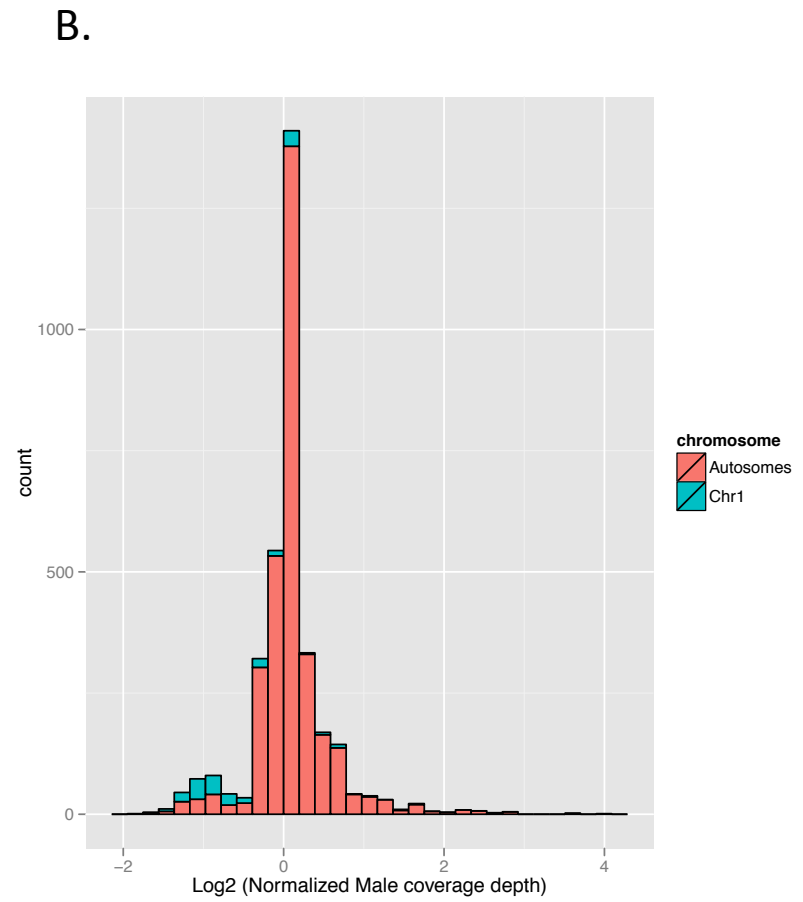

Figure S2

**Chr.1 (X)**

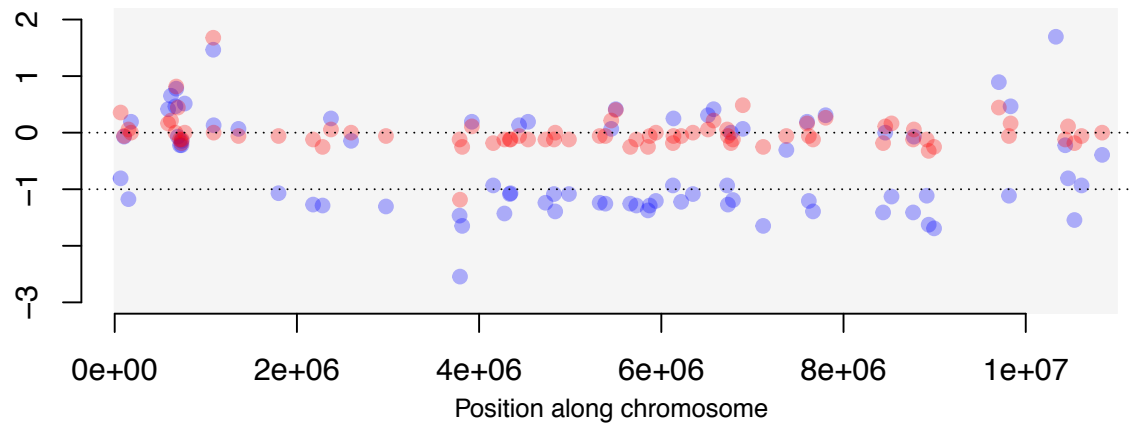

**Chr.4**

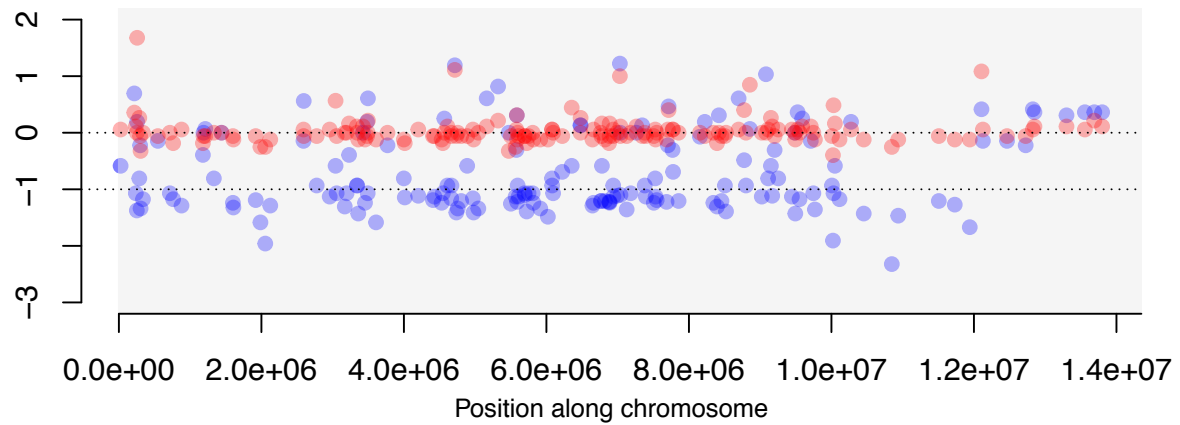

**Figure S3**

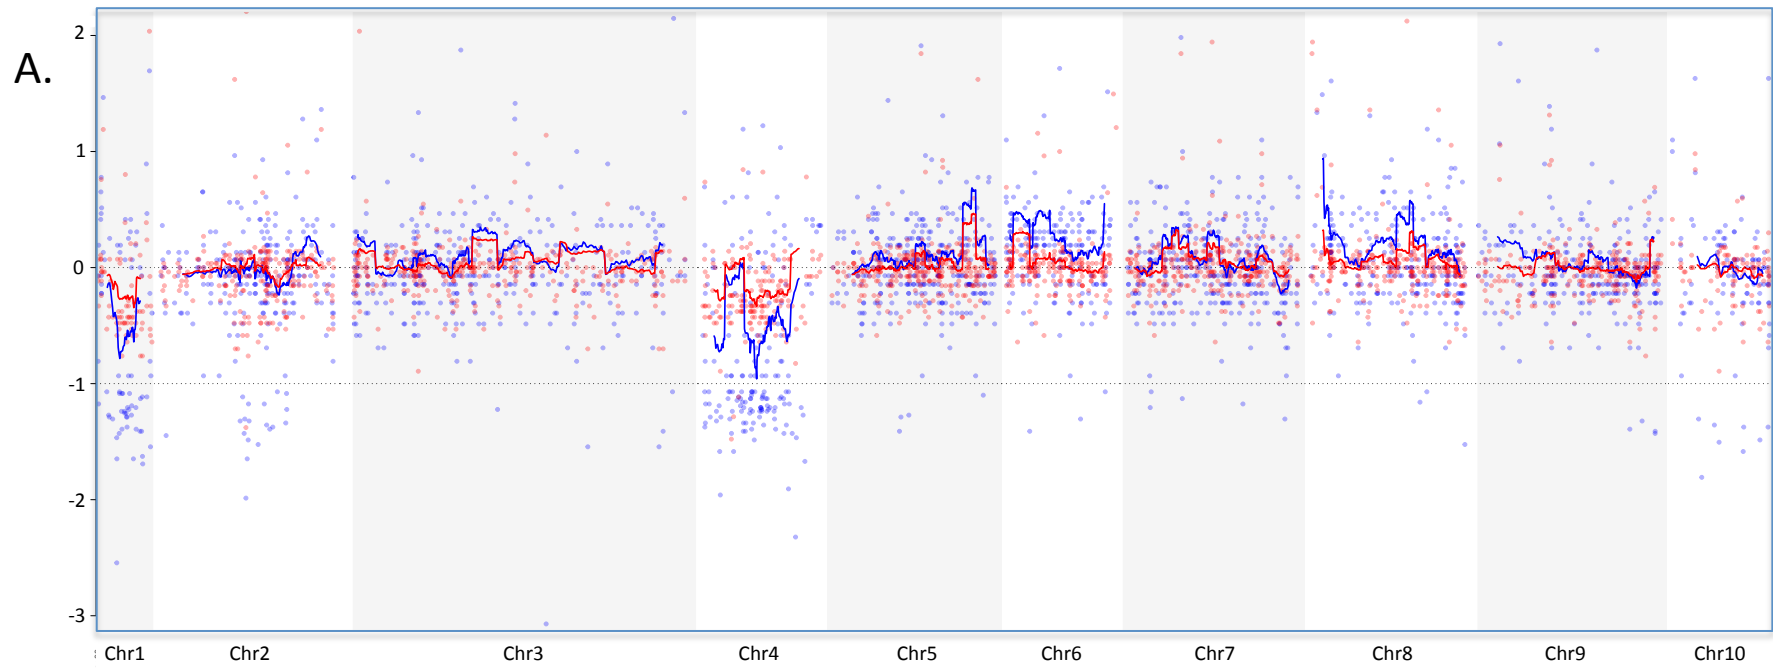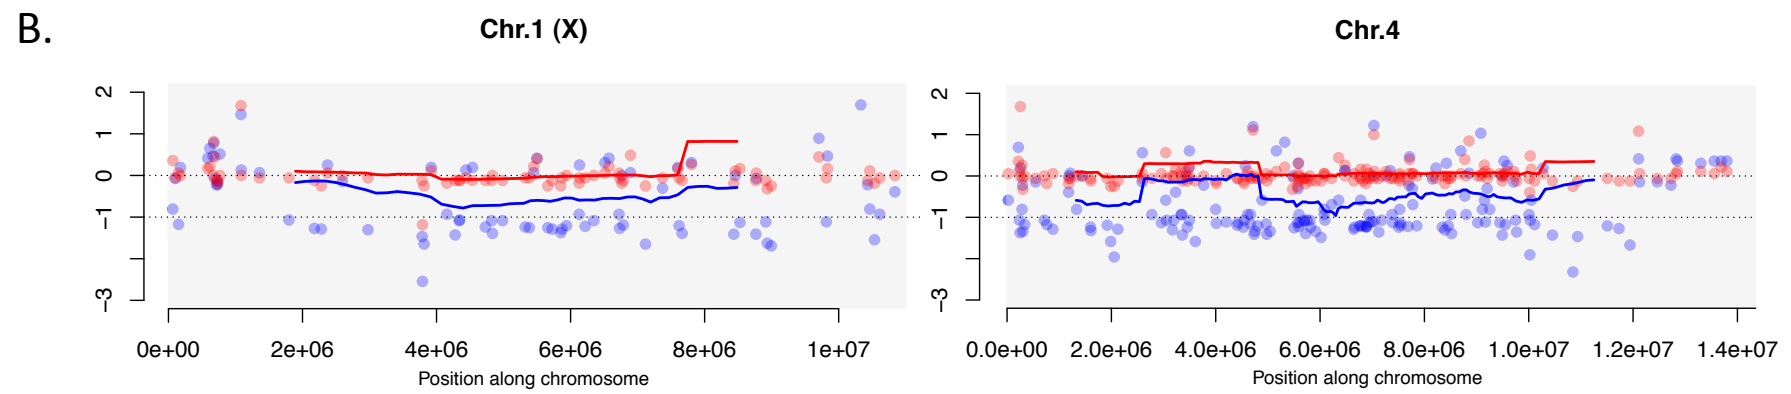

Figure S4

### FPKM cutoff

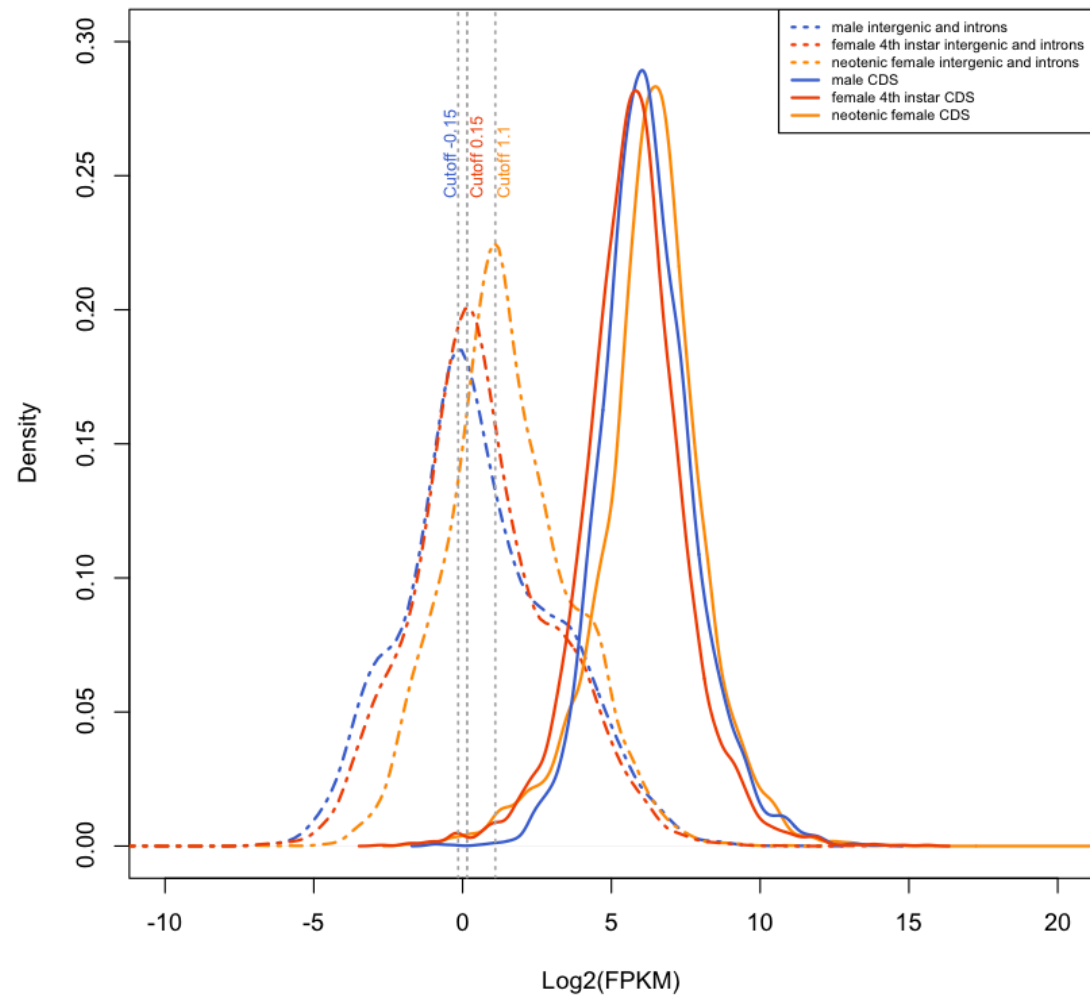

Figure S5

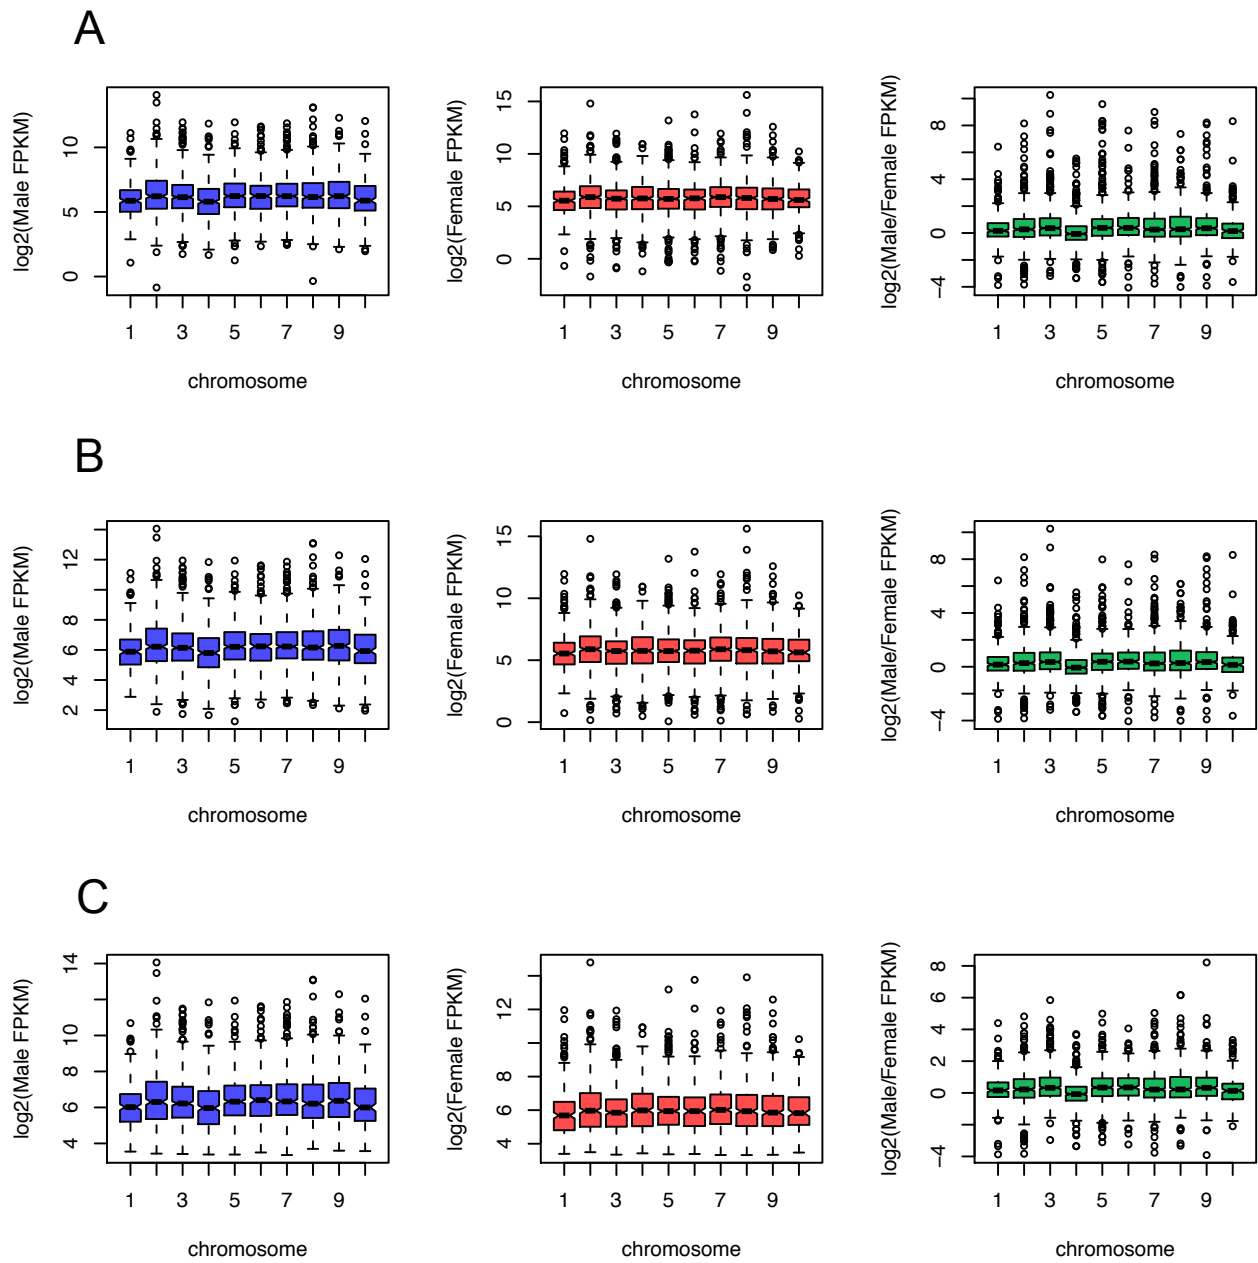

Figure S6

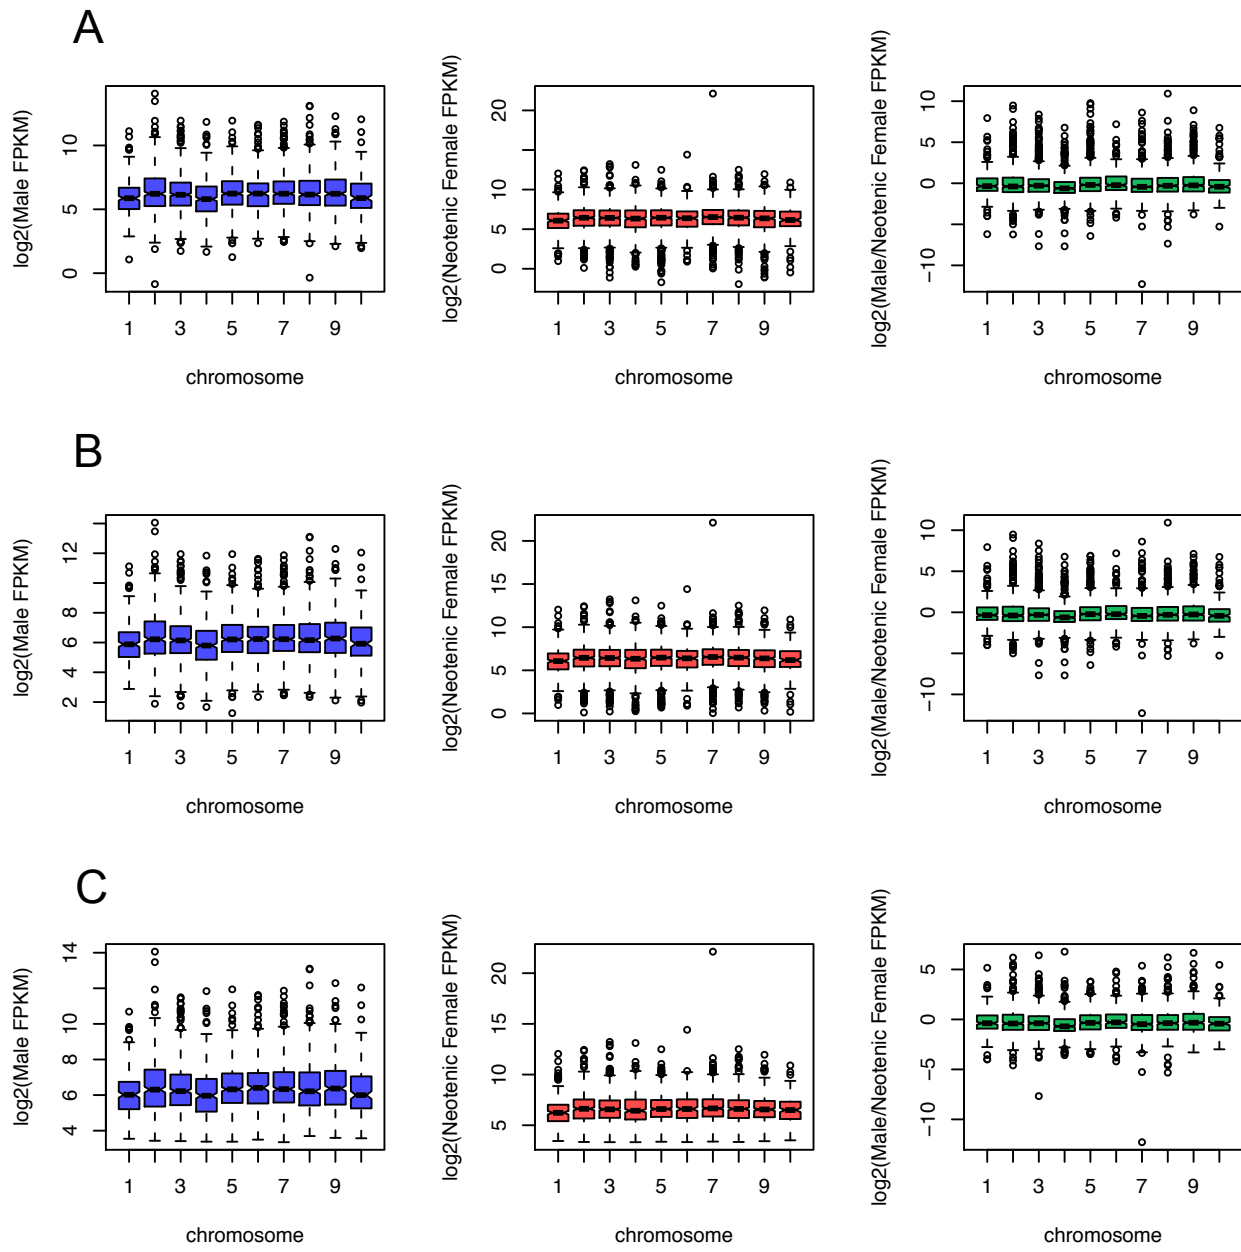

Figure S7

A.

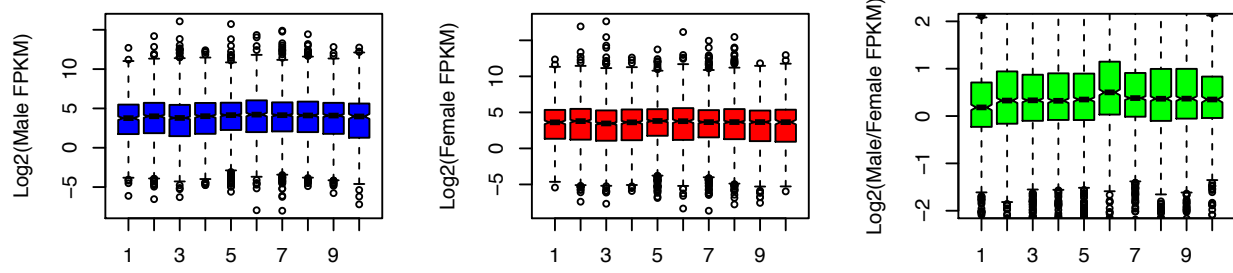

B.

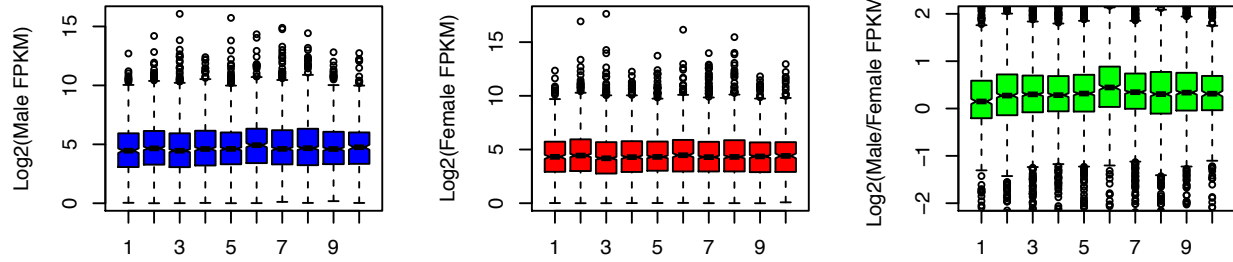

C.

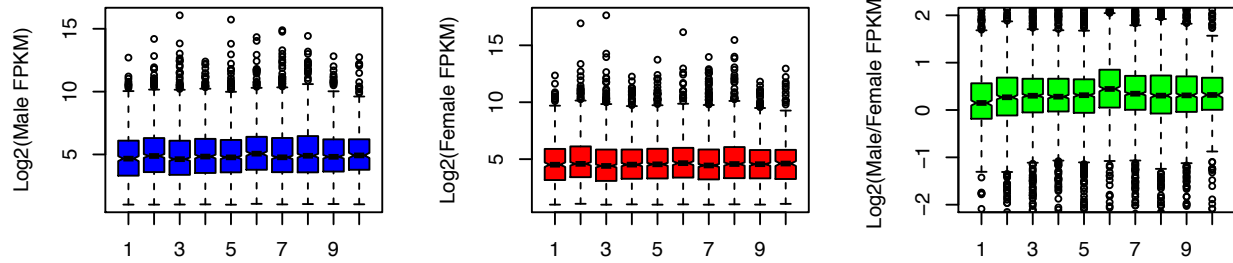

Figure S8



A.

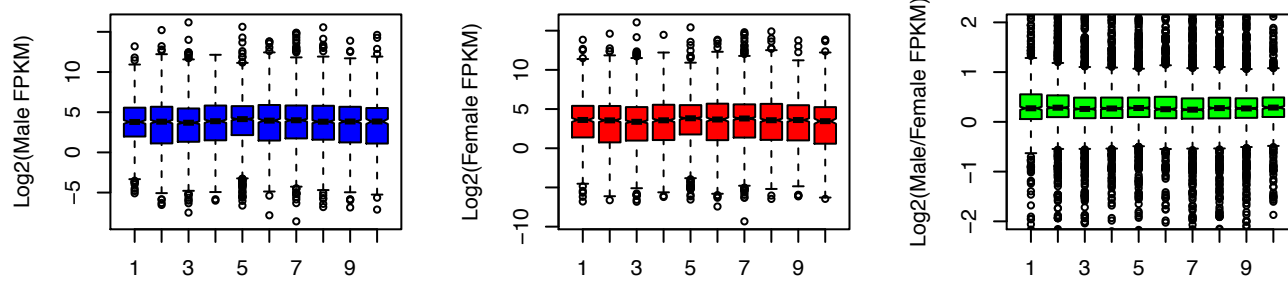

B.

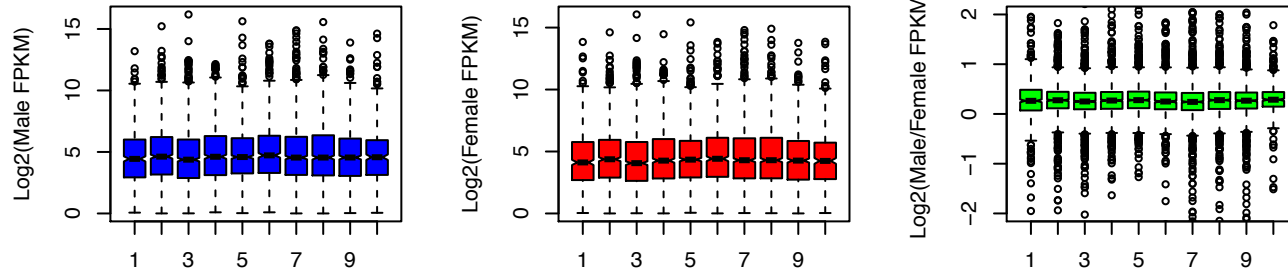

C.

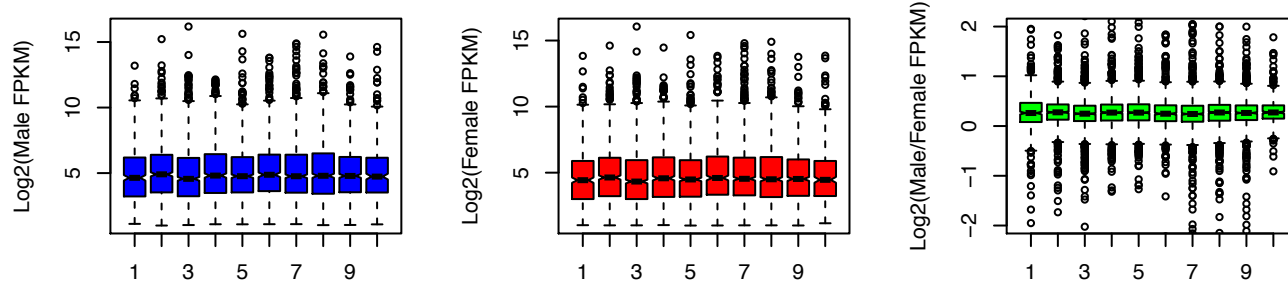

Figure S9

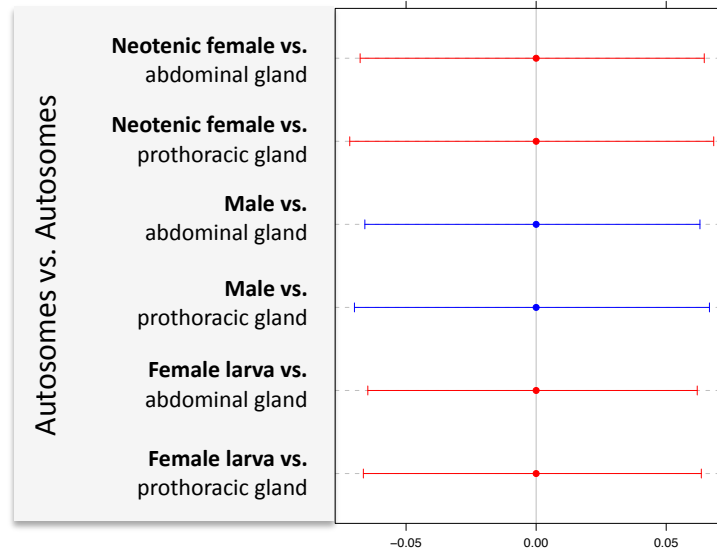

Figure S10

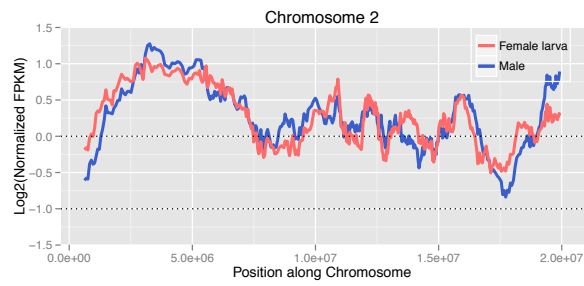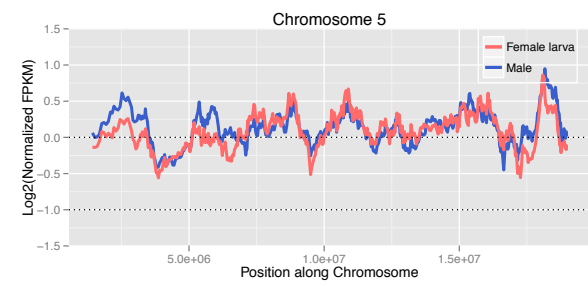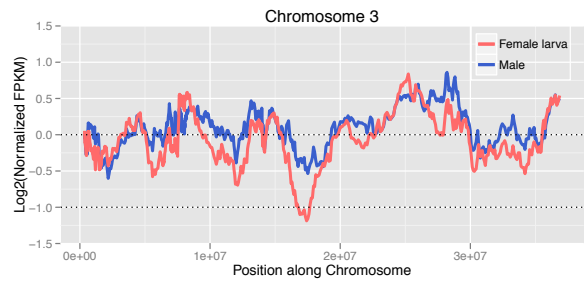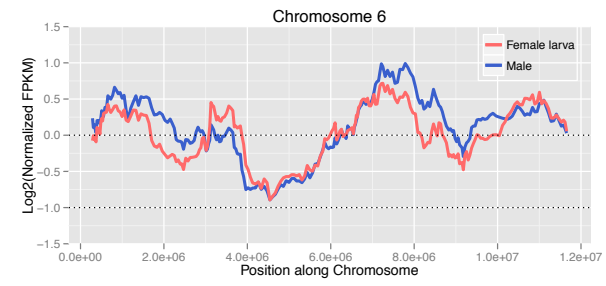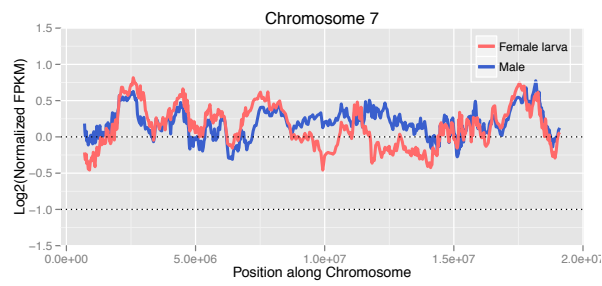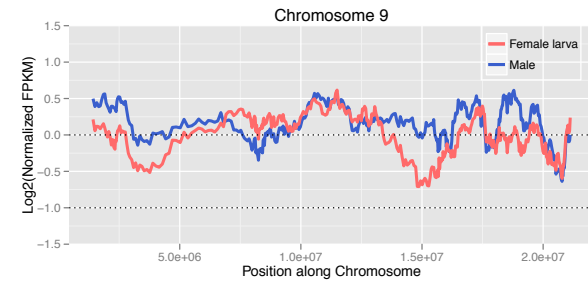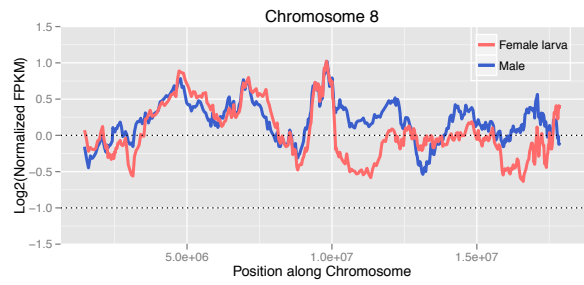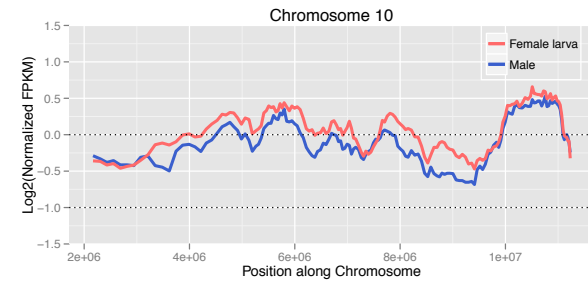

Figure S11

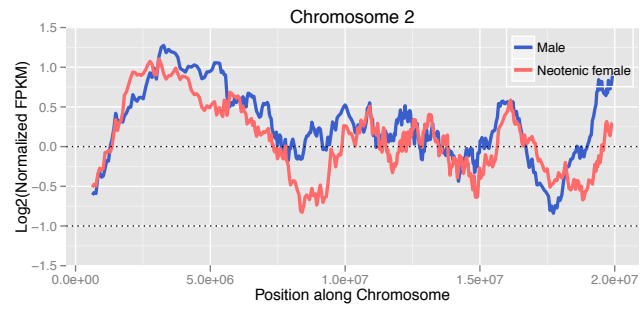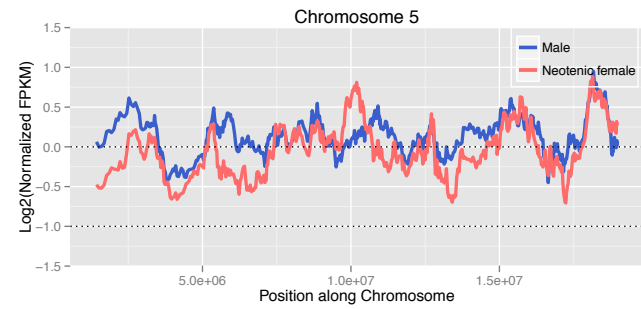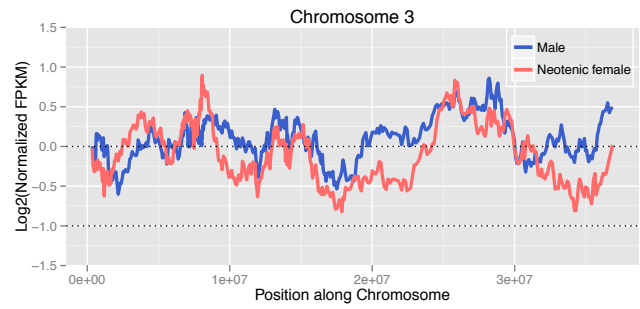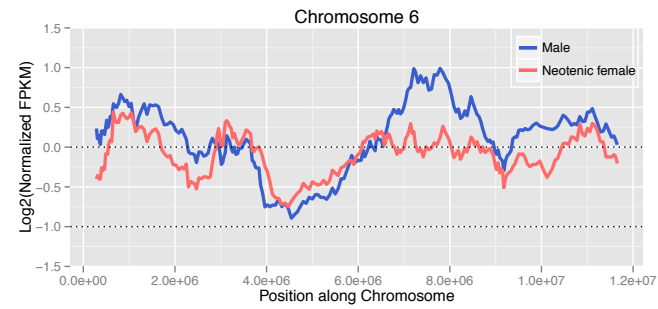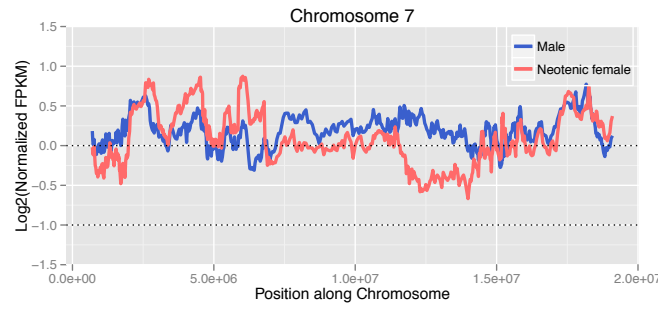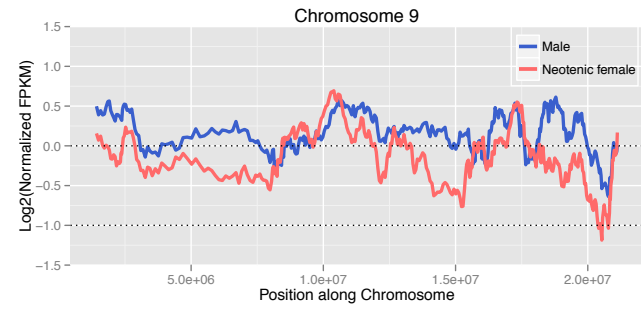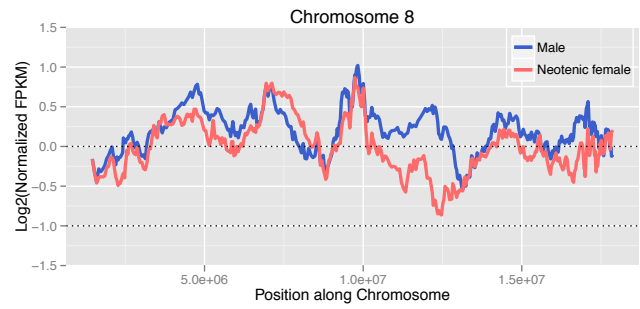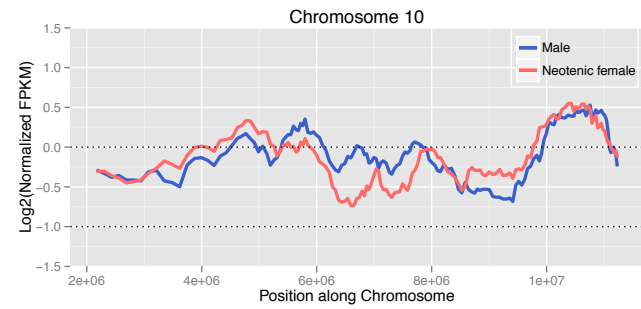

Figure S12

A.

Female larva

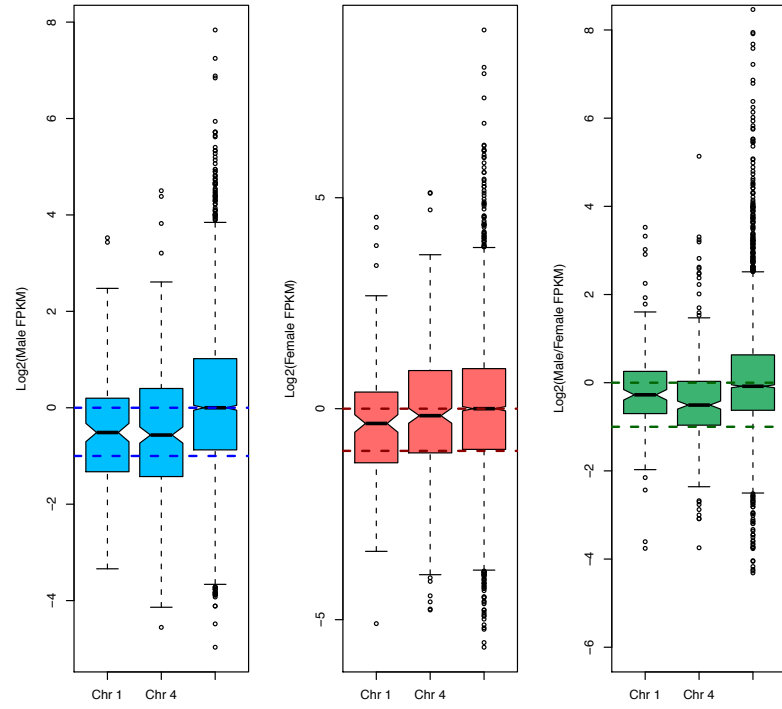

B.

Neotenic female

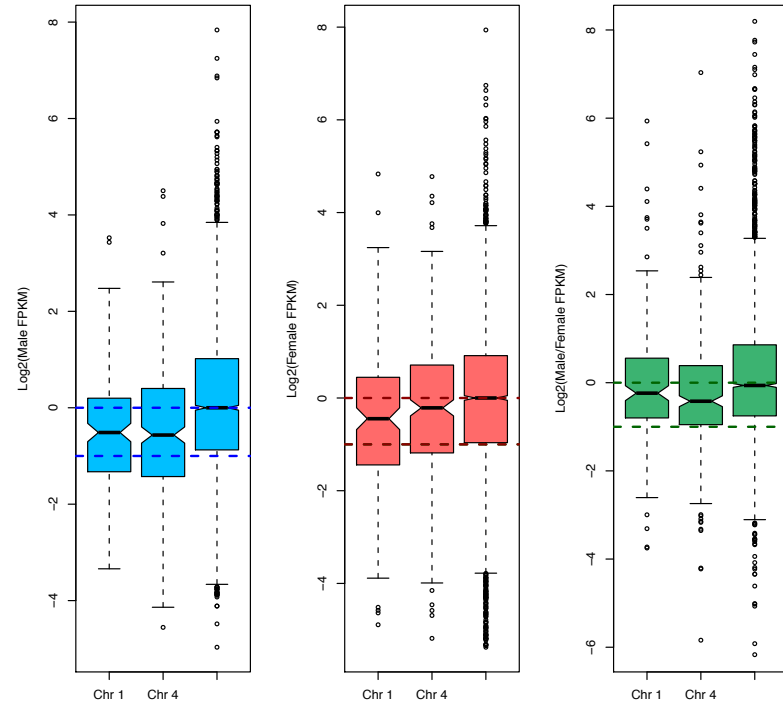

Figure S13
